# Supplementary material
Source: PubMed Central journal article supplement (PMC4573390)
Supplement: NIHMS658909-supplement-8.pdf [file NIHMS658909-supplement-8.pdf]

| <b>Gene</b> | <b>Primer</b>          |
|-------------|------------------------|
| hCTGF -fwd  | TGGCGAAGCTGACCTGGAA    |
| hCTGF-rev   | GATTTTGGGAGTACGGATGCA  |
| hCYR61 -fwd | GAATCATGGAGAAAATGGGCG  |
| hCYR61-rev  | CAATCGTGGCTGCATTAGTG   |
| mCTGF-fwd   | AGCTGACCTGGAGGAAAACA   |
| mCTGF-rev   | GACAGGCTTGGCGATTTTAG   |
| mCyr61-fwd  | CTGCGCTAAACAACCTCAACGA |
| mCyr61-rev  | GCAGATCCCTTTCAGAGCGG   |

**Sharif et al. Table S1**
