# Supplementary material
Source: PubMed Central journal article supplement (PMC4573390)
Supplement: NIHMS658909-supplement-9.pdf [file NIHMS658909-supplement-9.pdf]

| <b>Gene name</b> | <b>Fold</b> | <b>shRNA sequence</b>       |
|------------------|-------------|-----------------------------|
| <b>LATS 1</b>    | 57.3        | TGAGGAGGATCATCTGTCAGTAGCCTG |
|                  | 56.0        | GAGGATCATCTGTCAGTAGCCTGTTCA |
|                  | 16.6        | GATCATCTGTCAGTAGCCTGTTACCC  |

Sharif et al Table S2
