# Supplementary material
Source: PubMed Central journal article supplement (PMC4573390)

**A**

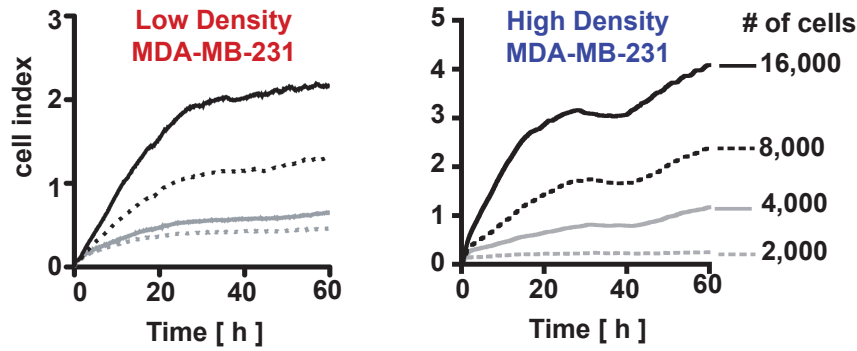

**B**

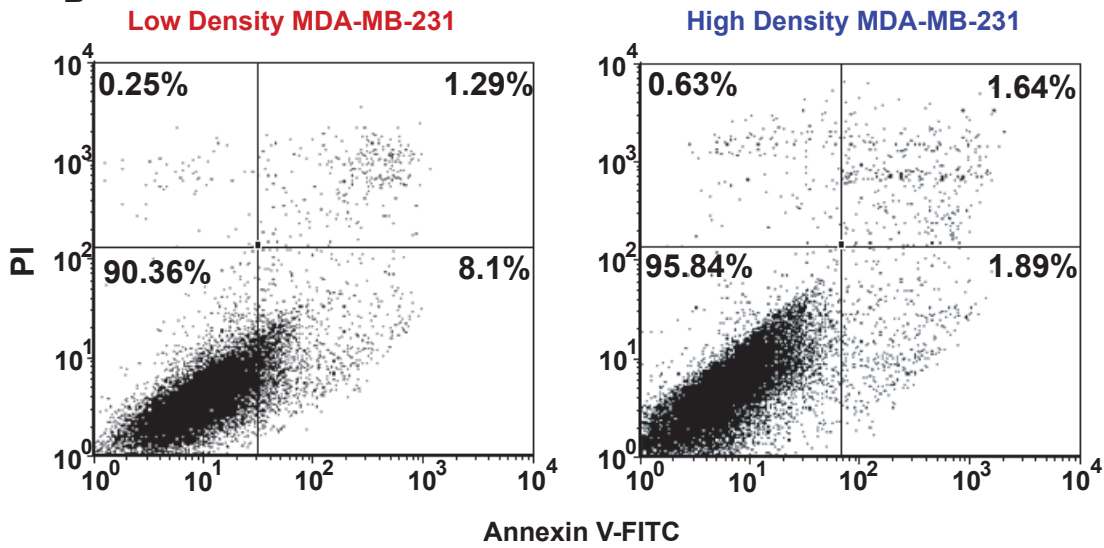

**C**

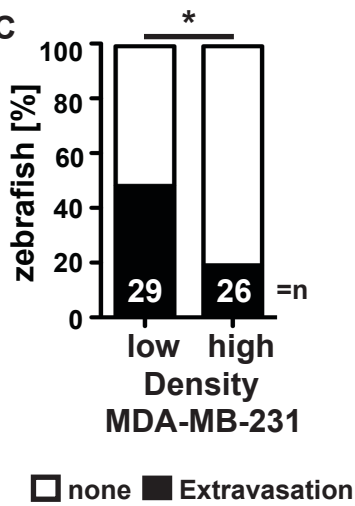

**D**

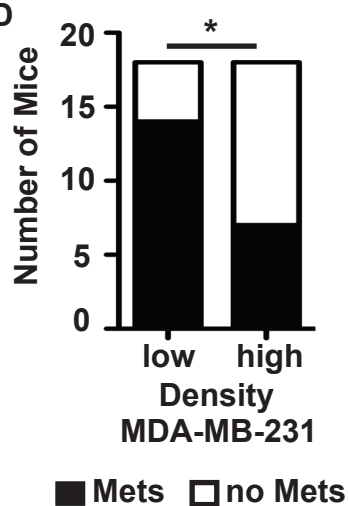

**E**

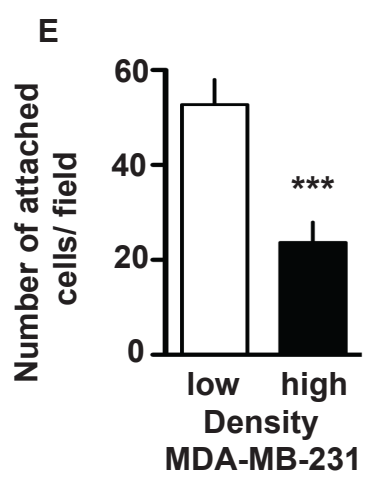

Supplement: NIHMS658909-supplement-1.pdf [file NIHMS658909-supplement-1.pdf]

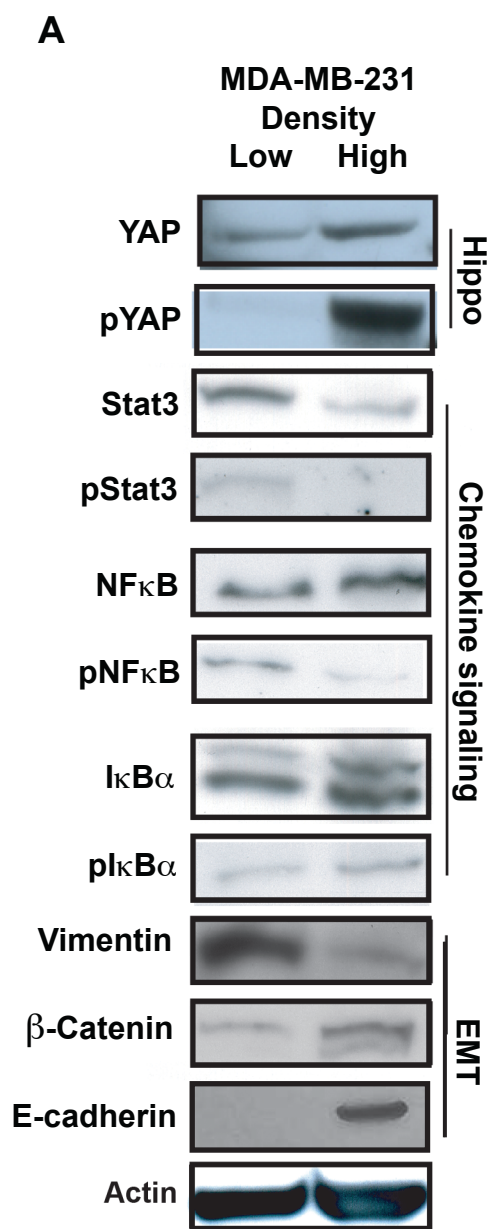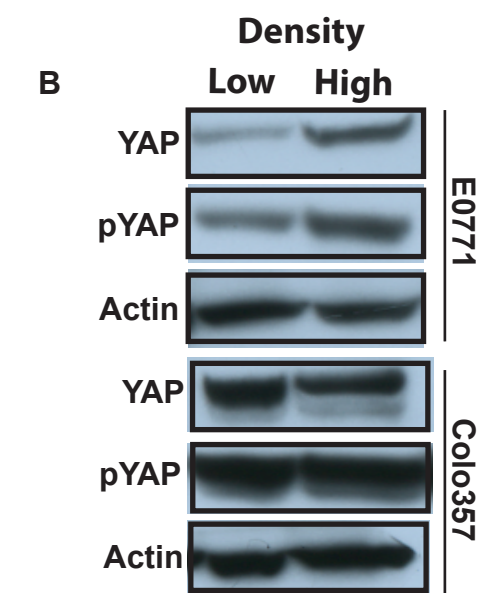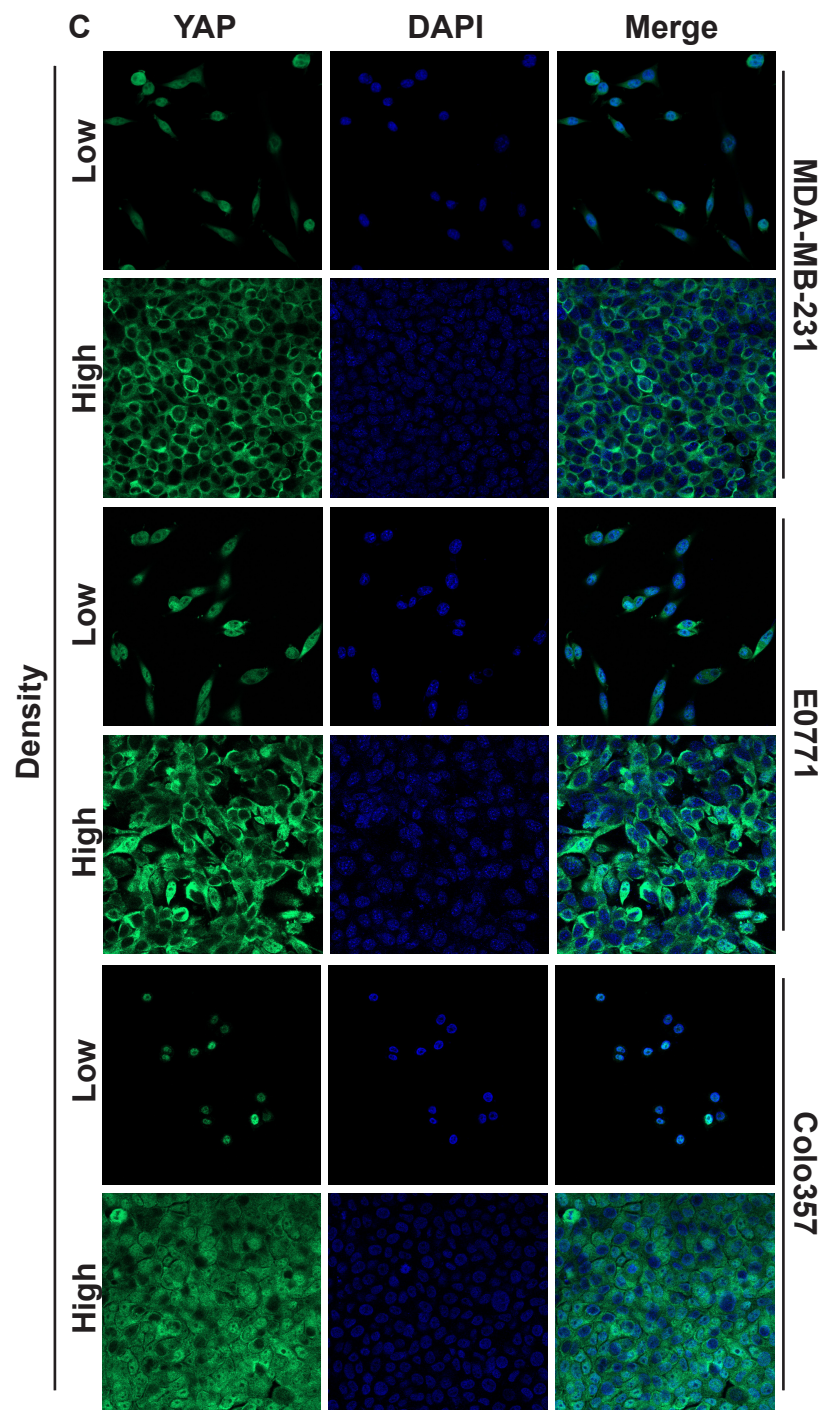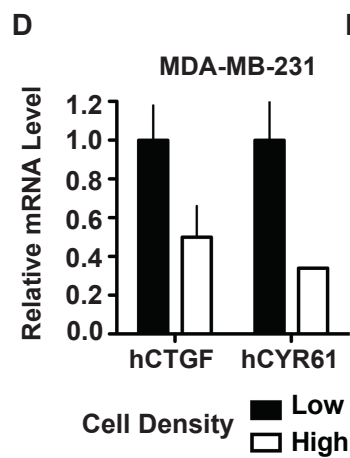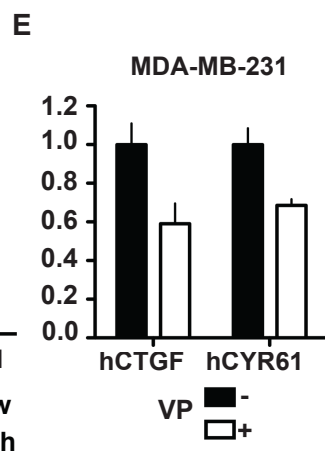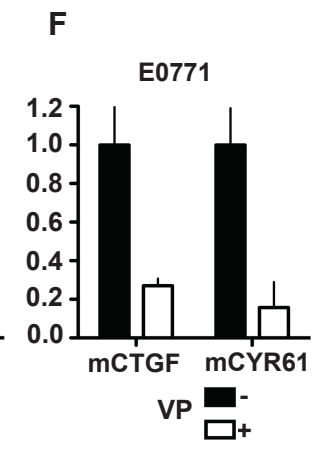

Supplement: NIHMS658909-supplement-2.pdf [file NIHMS658909-supplement-2.pdf]

**A****MDA-MB-231**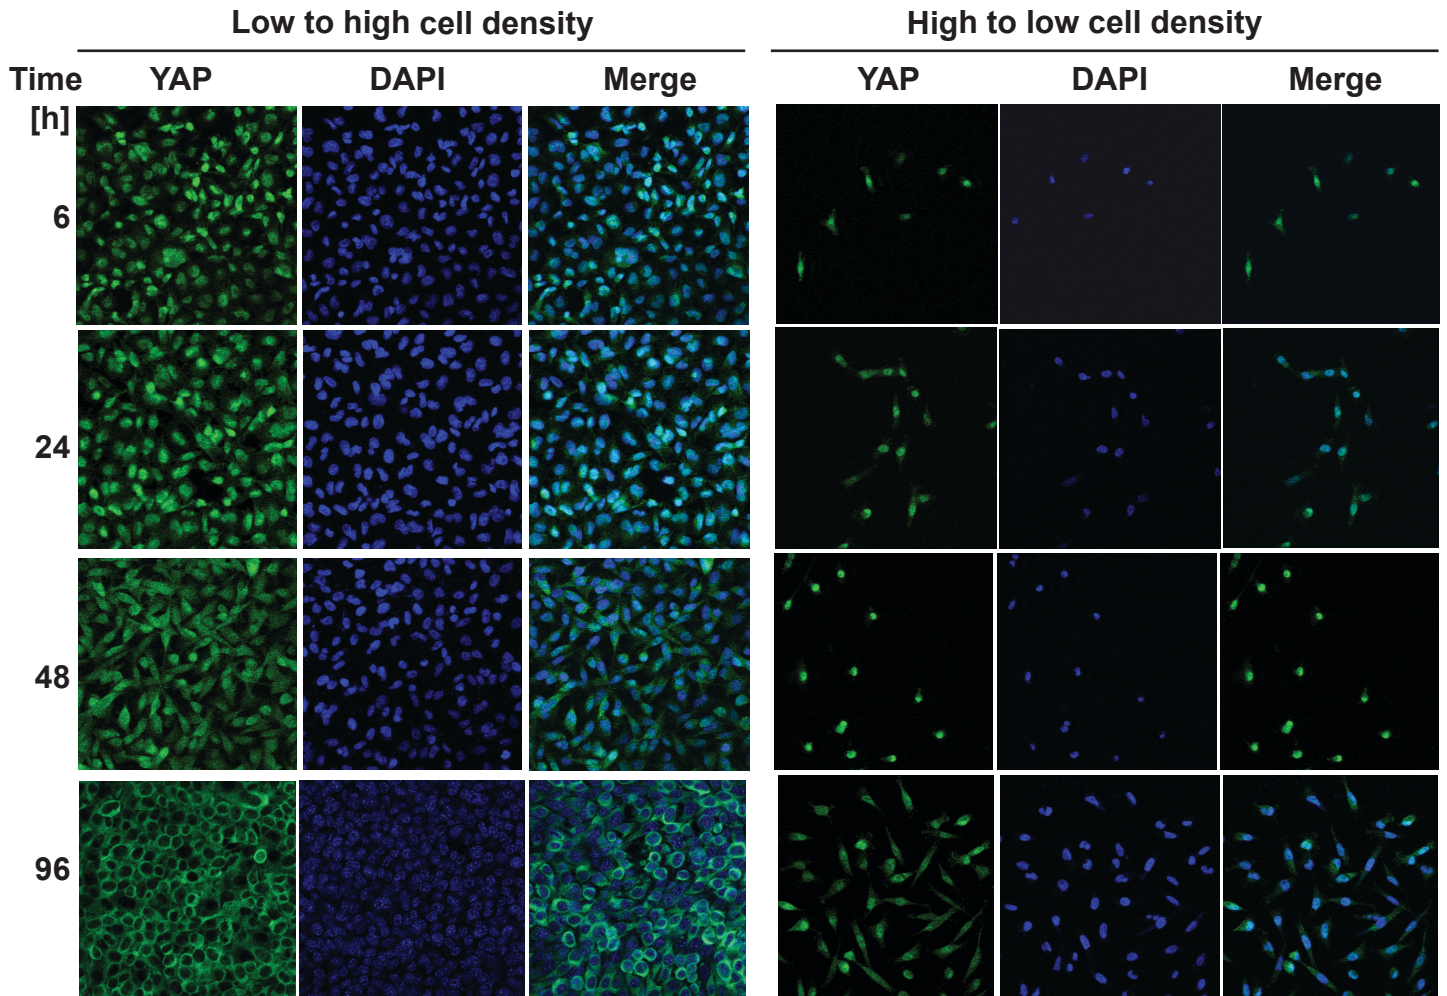**B**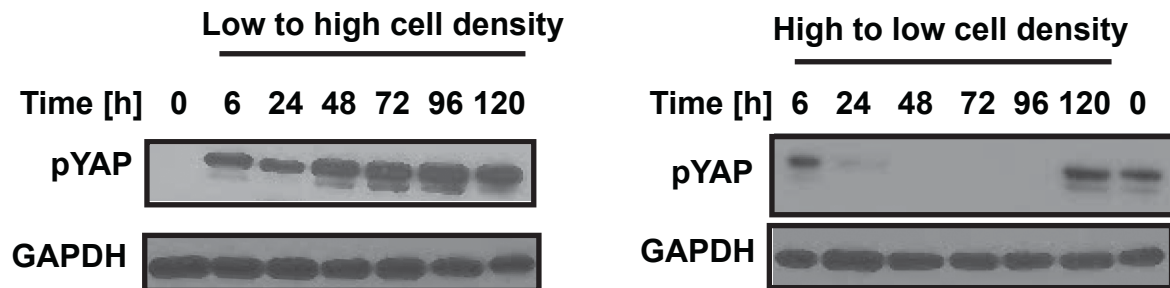

Sharif et al. Figure S3

Supplement: NIHMS658909-supplement-3.pdf [file NIHMS658909-supplement-3.pdf]

## Transendothelial Invasion

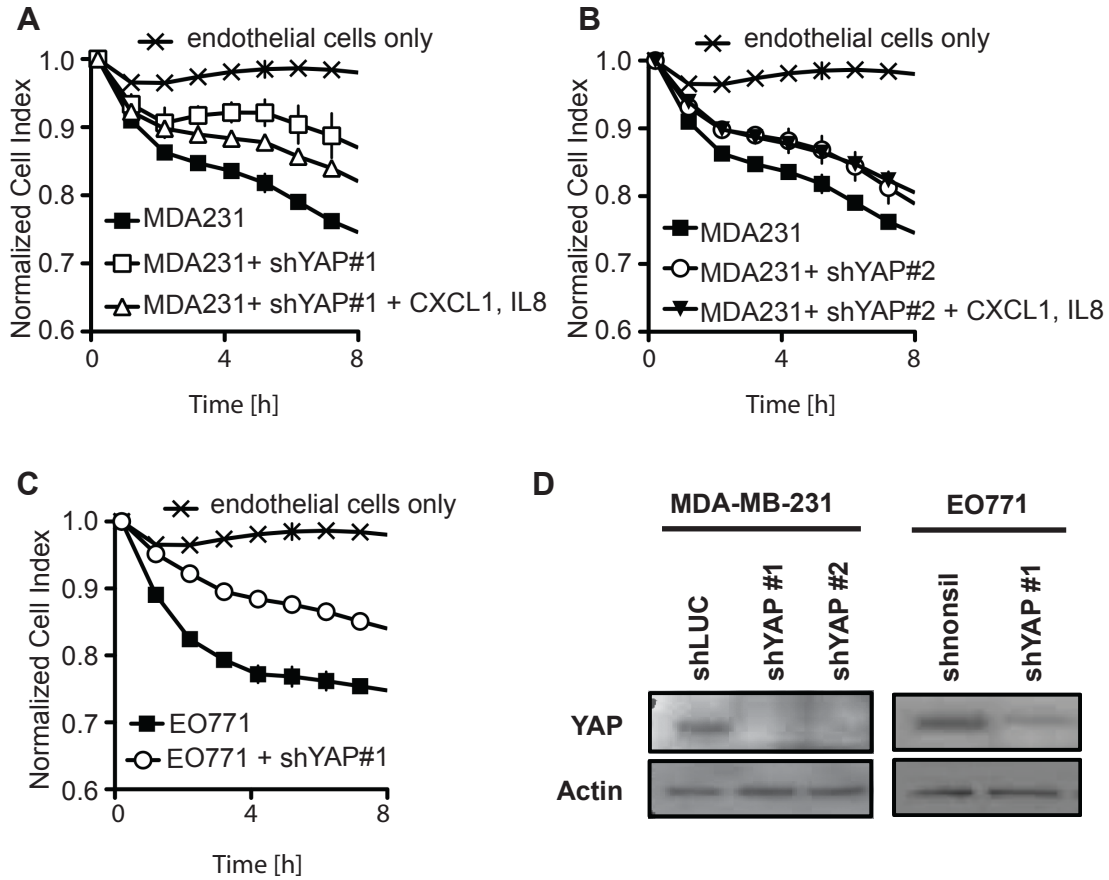

## Transwell Migration

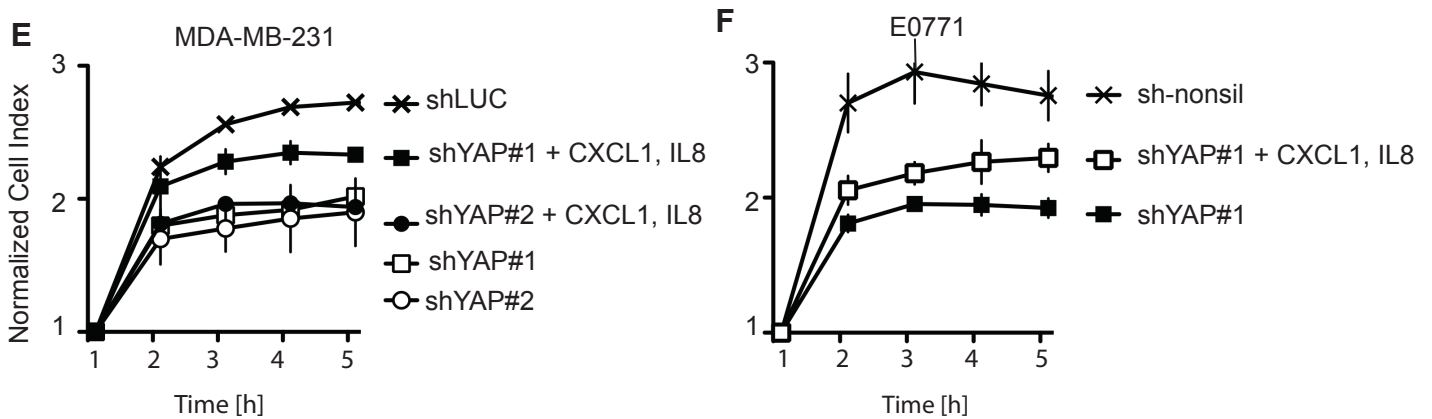

Supplement: NIHMS658909-supplement-4.pdf [file NIHMS658909-supplement-4.pdf]
